# Supplementary material
Source: publisher site journal article supplement (https://www.dovepress.com/article/281139)
Supplement: Supplementary file 1 [file get_supplementary_file.php]

Supplementary Methodology 1.

Responsiveness to change was assessed using the Spearman’s correlation coefficient between the change in score between baseline and 6 months and the rank of the global change question and by calculating the area under the ROC curve for the change from baseline at 6 months in each outcome measure to discriminate between improvers and non-improvers on the global change question. Two anchor based methods were used to estimate the MIC. The between patient score change estimate31 the MIC as the difference between the mean change from baseline in the group with a response of a bit better/a bit more independent and the group with a response of no change on the global change question. In the sensitivity and specificity based approach, for each observed change in the outcome at 6 months, the sensitivity and specificity to identify improvers in the global change question is calculated. The MIC is estimated as the change from baseline that maximises the Youden Index 32: sensitivity + specificity – 1. Responsiveness and MIC estimates were calculated using both the participant and supporter global change questions and are presented with 95% CIs.
